# Supplementary material for: Multiomic single-cell sequencing defines tissue-specific responses in Stevens-Johnson Syndrome and Toxic epidermal necrolysis
Source: PubMed Central journal article supplement — bioRxiv. 2024 Feb 18:2023.11.26.568771. Preprint. [Version 2] doi: 10.1101/2023.11.26.568771 (PMC10888802; doi:10.1101/2023.11.26.568771), 2024-02-18
Supplement: media-1.pdf [file media-1.pdf]

### CD4 and CD8 T-cells

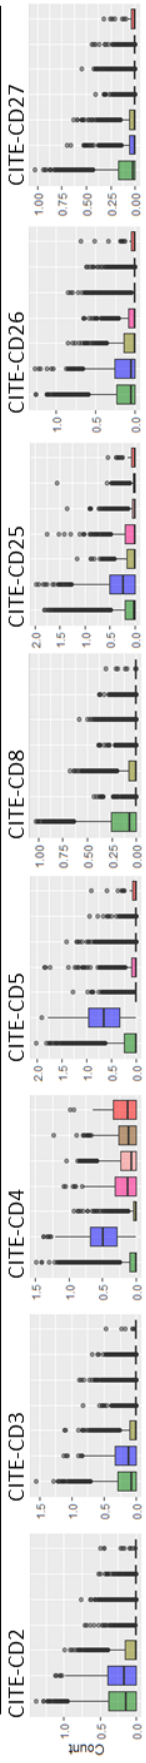

### T-cells

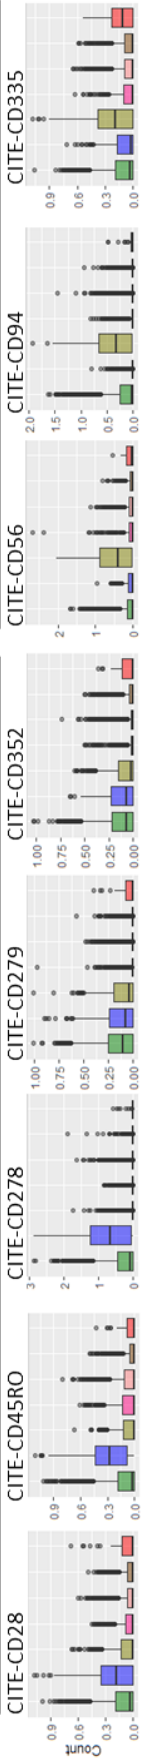

### B-cells

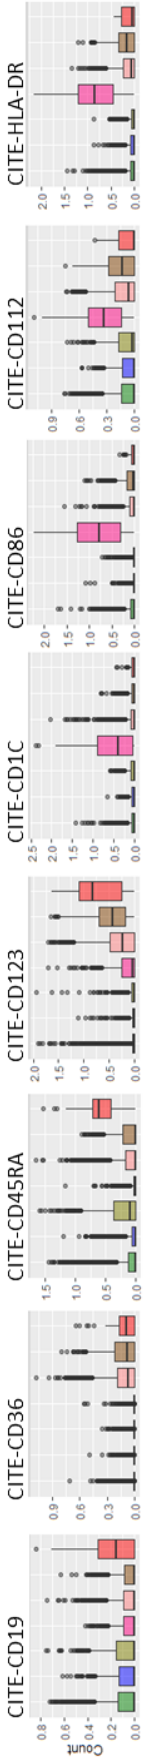

### DC, Monocytes, and Macrophages

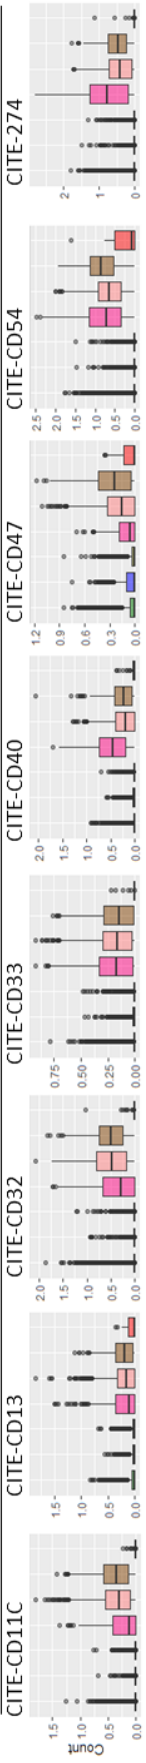

### Monocytes and Macrophages

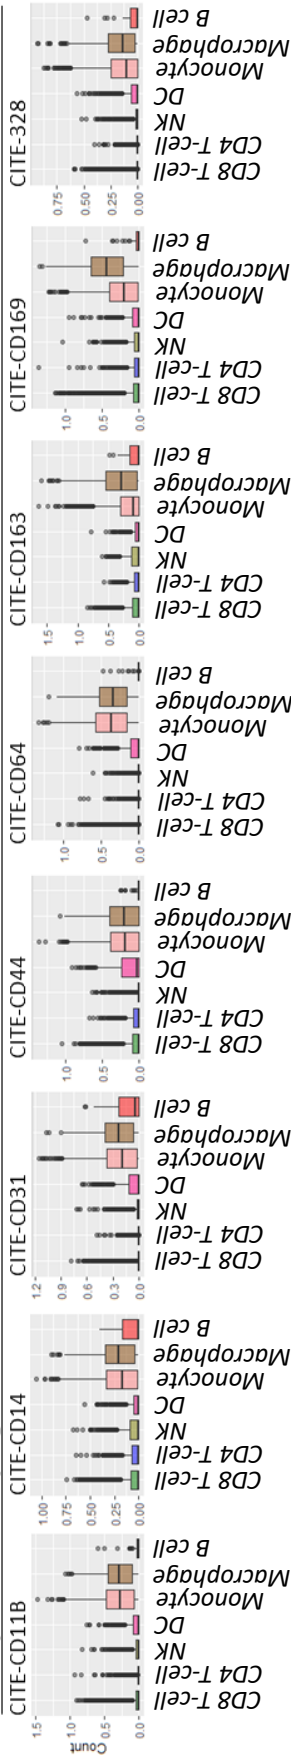

**Extended data Figure 1. Cell surface protein expression (scCITE-seq) of key lineage and activation markers on scRNA-defined immune cell subsets.** Box plots show the median expression for each cell surface protein across scRNA-subsets from a representative UMAP of SJS/TEN blister fluid and 17,629 cells obtained within a single 10x run. Surface proteins are grouped into panels headed by the scRNA-defined cell type with the highest median expression for that marker.
