# Supplementary material for: Multiomic single-cell sequencing defines tissue-specific responses in Stevens-Johnson Syndrome and Toxic epidermal necrolysis
Source: PubMed Central journal article supplement — bioRxiv. 2024 Feb 18:2023.11.26.568771. Preprint. [Version 2] doi: 10.1101/2023.11.26.568771 (PMC10888802; doi:10.1101/2023.11.26.568771), 2024-02-18
Supplement: media-3.pdf [file media-3.pdf]

**(i) UNAFFECTED SKIN (79 CD8+ Tconv cells with TCR expression)**

| TCR | CDR3 $\alpha$    | CDR3 $\beta$     | TRAV       | TRAJ   | TRBV     | TRBJ    | Ct. |
|-----|------------------|------------------|------------|--------|----------|---------|-----|
| 1   | CIVRVARNRTGNQYFY | CASSYHTGGSGYEQYF | TRAV26-1   | TRAJ49 | TRBV6-2  | TRBJ2-7 | 3   |
| 2   | CATDVMNRDDKIIF   | CASSLTARGSGVELFF | TRAV17     | TRAJ30 | TRBV13   | TRBJ2-2 | 2   |
| 3   | CAVSDRSGGGADGLTF | CASSLGLNVEQYF    | TRAV8-6    | TRAJ45 | TRBV28   | TRBJ2-7 | 2   |
| 4   | CAASVTGNQYFY     | CASSVESGGWYGYTF  | TRAV29/DV5 | TRAJ49 | TRBV9    | TRBJ1-2 | 2   |
| 5   | CALRGGWRRALTF    | CATSDDGAGTDTQYF  | TRAV19     | TRAJ5  | TRBV24-1 | TRBJ2-3 | 1   |
| 6   | CAGAGNAGNMLTF    | CASSQVRFYGYTF    | TRAV27     | TRAJ39 | TRBV4-3  | TRBJ1-2 | 1   |
| 7   | CALTQGAQKLVF     | CASSHLTGLFFF     | TRAV16     | TRAJ54 | TRBV11-2 | TRBJ2-2 | 1   |
| 8   | CAETSYGQNFVF     | CASSEMVSGETQYF   | TRAV5      | TRAJ26 | TRBV6-1  | TRBJ2-5 | 1   |
| 9   | CALRGGGAAGNKLTF  | CASSDNPPTYEAFF   | TRAV19     | TRAJ17 | TRBV7-9  | TRBJ1-1 | 1   |
| 10  | CALSEVTTSGTYKYIF | CASSQDRGGYEQYF   | TRAV19     | TRAJ40 | TRBV27   | TRBJ2-7 | 1   |

**AFFECTED SKIN (235 CD8+ Tconv cells with TCR expression)**

| TCR | CDR3 $\alpha$    | CDR3 $\beta$    | TRAV       | TRAJ   | TRBV     | TRBJ    | Ct. |
|-----|------------------|-----------------|------------|--------|----------|---------|-----|
| 1   | CALSEVTTSGTYKYIF | CASSQDRGGYEQYF  | TRAV19     | TRAJ40 | TRBV27   | TRBJ2-7 | 27  |
| 2   | CALSEVTTSGTYKYIF | CASSPDRGGYEQYF  | TRAV19     | TRAJ40 | TRBV27   | TRBJ2-7 | 20  |
| 3   | CIVRVHSGGGADGLTF | CASSPDRGGYEQYF  | TRAV26-1   | TRAJ45 | TRBV27   | TRBJ2-7 | 10  |
| 4   | CVVNNARNNDMRF    | CASSPDRGGYEQYF  | TRAV12-1   | TRAJ43 | TRBV27   | TRBJ2-7 | 4   |
| 5   | CLNDMRF          | CASSQLSGNSPLHF  | TRAV25     | TRAJ43 | TRBV3-1  | TRBJ1-6 | 3   |
| 6   | CAGRPPDSGTYKYIF  | CPPSLPRDDYEQYF  | TRAV35     | TRAJ40 | TRBV27   | TRBJ2-7 | 3   |
| 7   | CAVCQEDDYKLSF    | CSARDLAVYNSPLHF | TRAV22     | TRAJ20 | TRBV20-1 | TRBJ1-6 | 2   |
| 8   | CAASVTGNQYFY     | CASSVESGGWYGYTF | TRAV29/DV5 | TRAJ49 | TRBV9    | TRBJ1-2 | 2   |
| 9   | CAVSGYGGATNKLIF  | CASSLDRQSYEQYF  | TRAV21     | TRAJ32 | TRBV7-9  | TRBJ2-7 | 2   |
| 10  | CAVSPNNARLMF     | CASSLGVGSPLHF   | TRAV21     | TRAJ31 | TRBV5-1  | TRBJ1-6 | 2   |

**BLISTER FLUID 1 (ARM, 1336 CD8+ Tconv cells with TCR expression)**

| TCR | CDR3 $\alpha$     | CDR3 $\beta$          | TRAV     | TRAJ   | TRBV     | TRBJ    | Ct. |
|-----|-------------------|-----------------------|----------|--------|----------|---------|-----|
| 1   | CALSEVTTSGTYKYIF  | CASSPDRGGYEQYF        | TRAV19   | TRAJ40 | TRBV27   | TRBJ2-7 | 129 |
| 2   | CIVRVHSGGGADGLTF  | CASSPDRGGYEQYF        | TRAV26-1 | TRAJ45 | TRBV27   | TRBJ2-7 | 98  |
| 3   | CALSEVTTSGTYKYIF  | CASSQDRGGYEQYF        | TRAV19   | TRAJ40 | TRBV27   | TRBJ2-7 | 82  |
| 4   | CALSEARSSASKIIF   | CASSDRDRYEQYF         | TRAV19   | TRAJ3  | TRBV7-9  | TRBJ2-7 | 33  |
| 5   | CVVNNARNNDMRF     | CASSPDRGGYEQYF        | TRAV12-1 | TRAJ43 | TRBV27   | TRBJ2-7 | 24  |
| 6   | CALSESETSGSRLTF   | CASSLWEVERAYNEQFF     | TRAV19   | TRAJ58 | TRBV28   | TRBJ2-1 | 18  |
| 7   | CAVSLTYSGGGADGLTF | CSAKGGEQYF            | TRAV8-4  | TRAJ45 | TRBV20-1 | TRBJ2-7 | 17  |
| 8   | CAADTGGFKTIF      | CASLTSAGLNQPHF        | TRAV13-1 | TRAJ9  | TRBV19   | TRBJ1-5 | 16  |
| 9   | CVVNLVKLSF        | CASSQRAVDEQFF         | TRAV12-1 | TRAJ20 | TRBV7-9  | TRBJ2-1 | 14  |
| 10  | CATGTSYGKLTIF     | CASSLPTLGLAGGATDNEQFF | TRAV17   | TRAJ52 | TRBV28   | TRBJ2-1 | 13  |

**BLISTER FLUID 2 (FACE, 616 CD8+ Tconv cells with TCR expression)**

| TCR | CDR3 $\alpha$     | CDR3 $\beta$          | TRAV       | TRAJ   | TRBV     | TRBJ    | Ct. |
|-----|-------------------|-----------------------|------------|--------|----------|---------|-----|
| 1   | CALSEVTTSGTYKYIF  | CASSQDRGGYEQYF        | TRAV19     | TRAJ40 | TRBV27   | TRBJ2-7 | 43  |
| 2   | CALSEVTTSGTYKYIF  | CASSPDRGGYEQYF        | TRAV19     | TRAJ40 | TRBV27   | TRBJ2-7 | 42  |
| 3   | CIVRVHSGGGADGLTF  | CASSPDRGGYEQYF        | TRAV26-1   | TRAJ45 | TRBV27   | TRBJ2-7 | 29  |
| 4   | CALSEARSSASKIIF   | CASSDRDRYEQYF         | TRAV19     | TRAJ3  | TRBV7-9  | TRBJ2-7 | 14  |
| 5   | CAMNSYSGAGSYQLTF  | CASSPFYSGGDDTQYF      | TRAV14/DV4 | TRAJ28 | TRBV12-3 | TRBJ2-3 | 9   |
| 6   | CAADTGGFKTIF      | CASLTSAGLNQPHF        | TRAV13-1   | TRAJ9  | TRBV19   | TRBJ1-5 | 9   |
| 7   | CATGTSYGKLTIF     | CASSLPTLGLAGGATDNEQFF | TRAV17     | TRAJ52 | TRBV28   | TRBJ2-1 | 7   |
| 8   | CAVSLTYSGGGADGLTF | CSAKGGEQYF            | TRAV8-4    | TRAJ45 | TRBV20-1 | TRBJ2-7 | 6   |
| 9   | CALSESETSGSRLTF   | CASSLWEVERAYNEQFF     | TRAV19     | TRAJ58 | TRBV28   | TRBJ2-1 | 6   |
| 10  | CVVNLVKLSF        | CASSQRAVDEQFF         | TRAV12-1   | TRAJ20 | TRBV7-9  | TRBJ2-1 | 6   |

**BLISTER FLUID 3 (FOOT, 1039 CD8+ Tconv cells with TCR expression)**

| TCR | CDR3 $\alpha$     | CDR3 $\beta$          | TRAV       | TRAJ   | TRBV     | TRBJ    | Ct. |
|-----|-------------------|-----------------------|------------|--------|----------|---------|-----|
| 1   | CALSEVTTSGTYKYIF  | CASSPDRGGYEQYF        | TRAV19     | TRAJ40 | TRBV27   | TRBJ2-7 | 154 |
| 2   | CIVRVHSGGGADGLTF  | CASSPDRGGYEQYF        | TRAV26-1   | TRAJ45 | TRBV27   | TRBJ2-7 | 112 |
| 3   | CALSEVTTSGTYKYIF  | CASSQDRGGYEQYF        | TRAV19     | TRAJ40 | TRBV27   | TRBJ2-7 | 93  |
| 4   | CAVSLTYSGGGADGLTF | CSAKGGEQYF            | TRAV8-4    | TRAJ45 | TRBV20-1 | TRBJ2-7 | 18  |
| 5   | CAVYGNLRLAF       | CASSTGGLGNQPHF        | TRAV12-2   | TRAJ7  | TRBV6-5  | TRBJ1-5 | 14  |
| 6   | CVVNNARNNDMRF     | CASSPDRGGYEQYF        | TRAV12-1   | TRAJ43 | TRBV27   | TRBJ2-7 | 11  |
| 7   | CATGTSYGKLTIF     | CASSLPTLGLAGGATDNEQFF | TRAV17     | TRAJ52 | TRBV28   | TRBJ2-1 | 9   |
| 8   | CAMNSYSGAGSYQLTF  | CASSPFYSGGDDTQYF      | TRAV14/DV4 | TRAJ28 | TRBV12-3 | TRBJ2-3 | 9   |
| 9   | CAATGSGTYKYIF     | CASSMQGYTMNTEAFF      | TRAV29/DV5 | TRAJ40 | TRBV19   | TRBJ1-1 | 8   |
| 10  | CALSEARSSASKIIF   | CASSDRDRYEQYF         | TRAV19     | TRAJ3  | TRBV7-9  | TRBJ2-7 | 7   |

**(ii) UNAFFECTED SKIN****AFFECTED SKIN****BLISTER FLUID 1****BLISTER FLUID 2****BLISTER FLUID 3**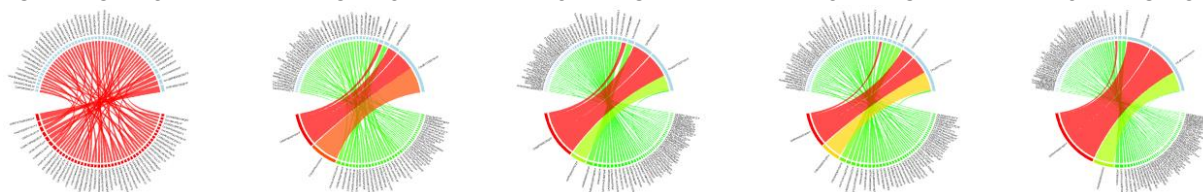

**Extended Data Figure 3. Top functional CDR3 $\alpha\beta$  clonotypes and counts in CD8 Tconv across paired samples from a single SJS/TEN patient.** (i) Top 10 CDR3 TCR $\alpha\beta$  clonotypes and counts in the CD8 Tconv population. Blue highlights indicate the same functional CDR3 $\alpha\beta$  clonotypes. (ii) Circos plots show comparative clonality and CDR3 $\alpha$  and CDR3 $\beta$  pairings between samples. The width of each segment is proportionate to its expression. Least to most dominant is colored green to red. Top 50 CDR3 $\alpha\beta$  clonotypes shown for each sample. *Tconv*, *T conventional cell*; *TCR*, *T-cell receptor*; *TRAV*, *TCR alpha variable*; *TRBV*, *TCR beta variable*; *TRAJ*, *TCR alpha joining*; *TRBJ*, *TCR beta joining*; *CDR3*, *complementary-determining region*; *Ct.*, *count*.
