# Supplementary material for: Multiomic single-cell sequencing defines tissue-specific responses in Stevens-Johnson Syndrome and Toxic epidermal necrolysis
Source: PubMed Central journal article supplement — bioRxiv. 2024 Feb 18:2023.11.26.568771. Preprint. [Version 2] doi: 10.1101/2023.11.26.568771 (PMC10888802; doi:10.1101/2023.11.26.568771), 2024-02-18
Supplement: media-5.pdf [file media-5.pdf]

**(i) Blister fluid: Expression of top expanded TCRs in CD8 Tconv**

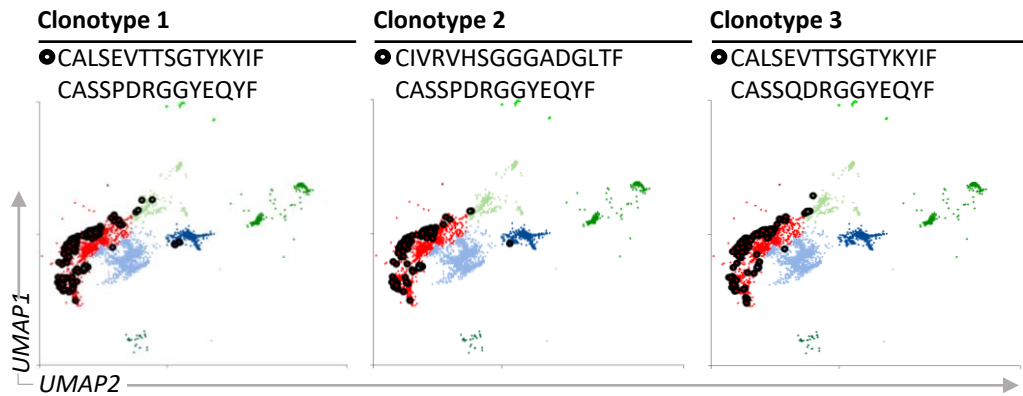

**(ii) Blister fluid: CDR3 $\alpha\beta$  expression of CD8 Tconv cells selected by each top clonotype**

| TCR | Cells expressing clonotype 1       |     | Cells expressing clonotype 2        |     | Cells expressing clonotype 3       |     |
|-----|------------------------------------|-----|-------------------------------------|-----|------------------------------------|-----|
|     | CDR3 $\alpha$ /CDR3 $\beta$        | Ct. | CDR3 $\alpha$ /CDR3 $\beta$         | Ct. | CDR3 $\alpha$ /CDR3 $\beta$        | Ct. |
| 1   | CALSEVTTSGTYKYIF<br>CASSPDRGGYEQYF | 325 | CIVRVHSGGGADGLTF<br>CASSPDRGGYEQYF  | 239 | CALSEVTTSGTYKYIF<br>CASSQDRGGYEQYF | 218 |
| 2   | CIVRVHSGGGADGLTF<br>CASSPDRGGYEQYF | 222 | CALSEVTTSGTYKYIF<br>CASSPDRGGYEQYF  | 222 |                                    |     |
| 3   | CVVNNARNNDMRF<br>CASSPDRGGYEQYF    | 37  | CIVRVHSGGGADGLTF<br>CASTLSAGLNQPQHF | 1   |                                    |     |
| 4   | CALSEVTTSGTYKYIF<br>CASSYDRGGYEQYF | 1   | CAADTGGFKTIF<br>CASSPDRGGYEQYF      | 1   |                                    |     |
| 5   |                                    |     | CAADTGGFKTIF<br>CASTLSAGLNQPQHF     | 1   |                                    |     |

**(iii) Affected skin: CDR3 $\alpha\beta$  expression of CD8 Tconv cells selected by each top clonotype**

| TCR | Cells expressing clonotype 1       |     | Cells expressing clonotype 2       |     | Cells expressing clonotype 3       |     |
|-----|------------------------------------|-----|------------------------------------|-----|------------------------------------|-----|
|     | CDR3 $\alpha$ /CDR3 $\beta$        | Ct. | CDR3 $\alpha$ /CDR3 $\beta$        | Ct. | CDR3 $\alpha$ /CDR3 $\beta$        | Ct. |
| 1   | CALSEVTTSGTYKYIF<br>CASSPDRGGYEQYF | 20  | CALSEVTTSGTYKYIF<br>CASSPDRGGYEQYF | 10  | CALSEVTTSGTYKYIF<br>CASSQDRGGYEQYF | 27  |
| 2   | CIVRVHSGGGADGLTF<br>CASSPDRGGYEQYF | 10  | CIVRVHSGGGADGLTF<br>CASSPDRGGYEQYF | 10  |                                    |     |
| 3   | CVVNNARNNDMRF<br>CASSPDRGGYEQYF    | 4   |                                    |     |                                    |     |

**Extended Data Figure 5. Top expanded TCR $\alpha\beta$  clonotypes in CD8 Tconv in**

**affected skin and blister fluid have shared expression on dual TCR $\alpha\beta$ <sup>+</sup> T-cells.** (i) Expression of each of the top 3 dominantly-expanded TCR on CD8 Tconv cells in blister fluid from a patient with SJS/TEN. Cells expressing each clonotype are circled in black. (ii) The TCR clonotypes and counts expressed by cells selected for expression of each top clonotype individually in SJS/TEN blister fluid. (iii) The TCR clonotypes and counts expressed by cells selected for expression of each top clonotype individually in SJS/TEN affected skin. Grey highlight indicates TCR expressed by the same cells. Ct., cell count. *Tconv*, *T conventional cell*; *TCR*, *T-cell receptor*; *CDR*, *complimentary-determining region*; *Ct.*, *Count*.
