# Supplementary material for: Multiomic single-cell sequencing defines tissue-specific responses in Stevens-Johnson Syndrome and Toxic epidermal necrolysis
Source: PubMed Central journal article supplement — bioRxiv. 2024 Feb 18:2023.11.26.568771. Preprint. [Version 2] doi: 10.1101/2023.11.26.568771 (PMC10888802; doi:10.1101/2023.11.26.568771), 2024-02-18
Supplement: media-6.pdf [file media-6.pdf]

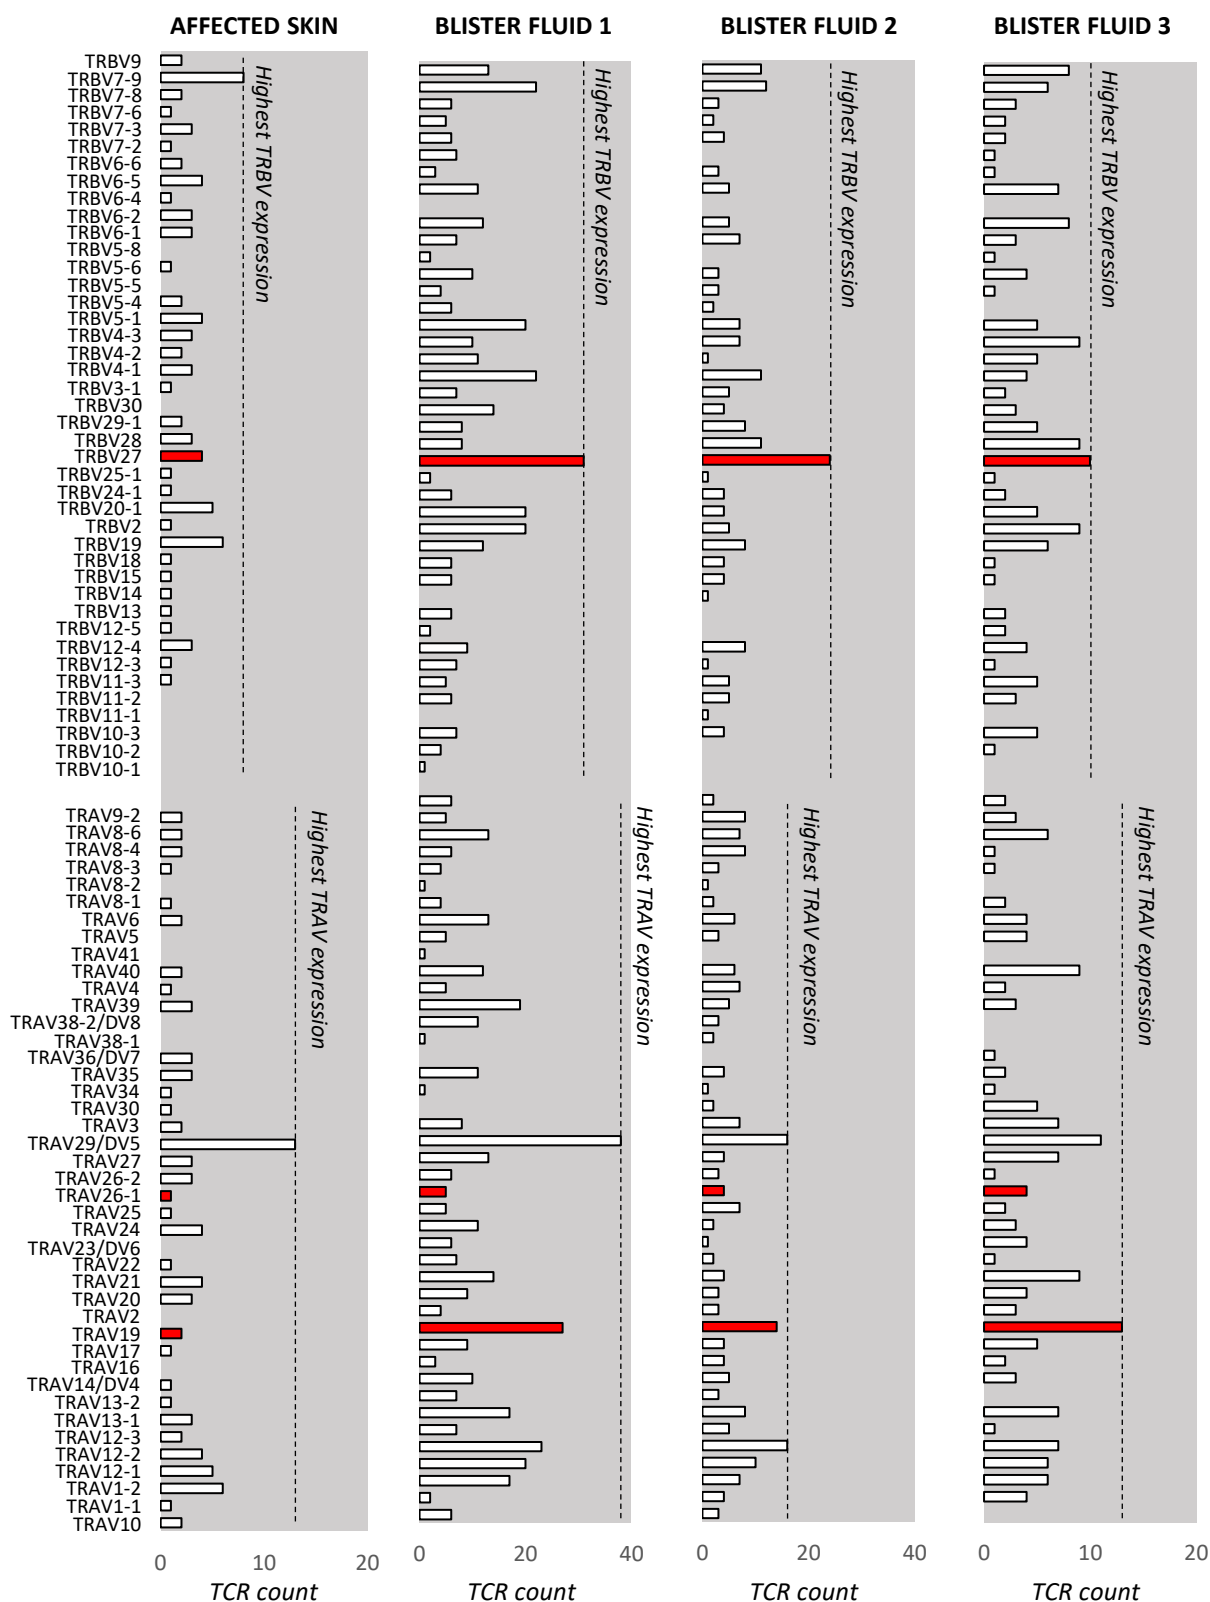

**Extended data Figure 6. Individual TRAV and TRBV scTCR-seq counts on unexpanded cells of CD8+ Tconv cluster 3 across samples from a single SJS/TEN patient.** Individual counts for all identified TRAV and TRBV genes across samples from unaffected skin, affected skin, and blister from three anatomical sites. The dominant TRAV and TRBV of the dominantly-expanded cells in CD8+ Tconv cluster 3 in affected skin and blister fluid are highlighted in red. Figure created using VGAS. TCR, T-cell receptor; TRAV, TCR alpha variable; TRBV, TCR beta variable; Tconv, T conventional cell.
