# Supplementary material for: Multiomic single-cell sequencing defines tissue-specific responses in Stevens-Johnson Syndrome and Toxic epidermal necrolysis
Source: PubMed Central journal article supplement — bioRxiv. 2024 Feb 18:2023.11.26.568771. Preprint. [Version 2] doi: 10.1101/2023.11.26.568771 (PMC10888802; doi:10.1101/2023.11.26.568771), 2024-02-18
Supplement: media-7.pdf [file media-7.pdf]

**Extended Data Table 1. Differential gene signatures of Seurat-defined CD8 Tconv clusters 1-8.** The top 25 genes that show significant (Wilcoxon rank sum test, Benjamini Hochberg adjusted  $p < 0.05$ ) increased expression are shown in order of fold change. Red font indicates genes below significance. Genes shared or indicative of shared functional state between clusters 1-2 (blue), clusters 3-4 (red), and clusters 5-8 (green) are highlighted. *Tconv*, *T conventional cell*; *FC*, *fold change*.

Quiescent/inactive

Cytotoxic/proliferative

Innate-like

| Rank | CD8 Tconv cluster 1 |        | CD8 Tconv cluster 2 |           | CD8 Tconv cluster 3 |         | CD8 Tconv cluster 4 |        | CD8 Tconv cluster 5 |           | CD8 Tconv cluster 6 |         | CD8 Tconv cluster 7 |        | CD8 Tconv cluster 8 |           |        |         |           |     |         |          |     |         |
|------|---------------------|--------|---------------------|-----------|---------------------|---------|---------------------|--------|---------------------|-----------|---------------------|---------|---------------------|--------|---------------------|-----------|--------|---------|-----------|-----|---------|----------|-----|---------|
|      | Gene                | Log2FC | p value             | Gene      | Log2FC              | p value | Gene                | Log2FC | p value             | Gene      | Log2FC              | p value | Gene                | Log2FC | p value             | Gene      | Log2FC | p value |           |     |         |          |     |         |
| 1    | DCD                 | 11.4   | 1.7E-04             | CMC1      | 2.7                 | 2.2E-29 | TYMS                | 4.8    | 4.0E-37             | S100A8    | 5.6                 | 9.2E-47 | CST3                | 4.9    | 1.8E-11             | IDO1      | 7.5    | 6.0E-66 | TYROBP    | 5.1 | 3.0E-15 |          |     |         |
| 2    | MUC11               | 6.7    | 1.5E-02             | LTB       | 2.5                 | 1.8E-25 | STMN1               | 3.3    | 5.4E-22             | NKG7      | 4.7                 | 1.0E-22 | S100A8              | 4.5    | 4.6E-09             | CXCL10    | 7.4    | 1.2E-68 | XCL1      | 4.8 | 1.1E-08 |          |     |         |
| 3    | XIST                | 1.9    | 6.2E-03             | FOS       | 2.4                 | 2.8E-23 | KLRC1               | 3.0    | 3.6E-19             | CENPF     | 4.0                 | 8.6E-15 | S100A9              | 5.1    | 2.2E-36             | TYROBP    | 3.8    | 9.7E-06 | XCL2      | 4.6 | 4.3E-05 |          |     |         |
| 4    | MALAT1              | 1.8    | 1.3E-02             | IL7R      | 2.2                 | 1.8E-19 | TRAV12-3            | 3.0    | 1.4E-18             | HIST1H4C  | 3.3                 | 5.0E-09 | TYROBP              | 4.8    | 5.0E-31             | FCER1G    | 7.3    | 4.7E-66 | XCL2      | 4.6 | 4.3E-05 |          |     |         |
| 5    | NEAT1               | 1.7    | 2.0E-02             | DUSP1     | 1.9                 | 7.4E-14 | GNLV                | 2.9    | 2.2E-18             | HIST1H1E  | 3.2                 | 9.1E-09 | LYZ                 | 4.7    | 1.2E-27             | TRAV17    | 2.9    | 1.8E-02 | MARCKS    | 7.2 | 4.3E-59 | KLRB1    | 4.0 | 7.3E-07 |
| 6    | CTSD                | 1.7    | 2.7E-02             | HSPA1A    | 1.8                 | 5.7E-11 | TRBV9               | 2.8    | 2.6E-17             | STMN1     | 3.1                 | 6.5E-08 | FCER1G              | 4.3    | 1.4E-22             | IFITM3    | 2.2    | 3.0E-01 | THBS1     | 7.0 | 3.2E-58 | CMC1     | 3.6 | 6.8E-05 |
| 7    | GRK2                | 1.4    | 8.2E-02             | ZFP36     | 1.8                 | 6.9E-13 | TUBA1B              | 2.7    | 1.3E-16             | HIST1H1D  | 3.0                 | 2.8E-07 | AIFI                | 3.6    | 3.7E-13             | FOS       | 2.1    | 3.0E-01 | SERPINA1  | 6.9 | 3.8E-53 | ARG      | 2.7 | 5.2E-02 |
| 8    | MACF1               | 1.4    | 8.7E-02             | JUNB      | 1.7                 | 2.6E-11 | GALNT2              | 2.4    | 5.8E-14             | HIST1H1C  | 2.8                 | 3.8E-06 | GLUL                | 3.3    | 1.1E-10             | HIST1H2AI | 1.6    | 7.9E-01 | CLSorff48 | 6.8 | 7.5E-52 | FOS      | 2.5 | 9.8E-02 |
| 9    | AKNA                | 1.4    | 9.0E-02             | DUSP2     | 1.6                 | 5.1E-10 | TRBV4-1             | 2.1    | 3.0E-10             | CERPD     | 2.7                 | 2.2E-05 | FOS                 | 2.9    | 2.2E-07             | H1A-DPA1  | 1.3    | 1.0E+00 | SP1       | 6.6 | 3.3E-48 | KLRD1    | 2.0 | 5.8E-01 |
| 10   | NIRC3               | 1.4    | 9.6E-02             | DNAI1B1   | 1.5                 | 2.1E-08 | TUBB                | 2.0    | 4.6E-10             | LINC01871 | 2.2                 | 3.7E-03 | IFITM3              | 2.6    | 6.0E-06             | CTSB      | 1.2    | 1.0E+00 | S100A8    | 6.6 | 1.1E-50 | DUSP1    | 2.0 | 4.9E-01 |
| 11   | SYNE2               | 1.4    | 9.5E-02             | TXNIP     | 1.3                 | 1.3E-06 | ACPS                | 2.0    | 5.5E-10             | GNLV      | 2.2                 | 4.2E-03 | H1A-DOA1            | 2.5    | 5.2E-05             | HIST1H1E  | 1.2    | 1.0E+00 | CD14      | 6.6 | 5.2E-52 | PPP1R14B | 1.8 | 6.1E-01 |
| 12   | NKTR                | 1.4    | 1.0E-01             | CXR4      | 1.3                 | 1.5E-06 | HAVCR2              | 2.0    | 8.2E-10             | HMGB2     | 2.2                 | 5.4E-03 | IFIT3               | 2.5    | 5.9E-05             | SAT1      | 1.2    | 1.0E+00 | CD14      | 6.5 | 4.0E-46 | IL7R     | 1.8 | 9.1E-01 |
| 13   | IKZF3               | 1.3    | 1.2E-01             | H1A-DPA1  | 1.3                 | 2.6E-06 | HAVCR2              | 2.0    | 1.1E-09             | TUBA1B    | 2.4                 | 1.7E-04 | FTL                 | 2.4    | 1.7E-04             | FTL       | 1.1    | 1.0E+00 | C1QA      | 6.4 | 2.5E-46 | IFITM3   | 1.6 | 8.0E-01 |
| 14   | INPP5D              | 1.3    | 1.2E-01             | H1A-DPB1  | 1.2                 | 1.1E-05 | IGALS1              | 1.8    | 8.0E-09             | MT1E      | 1.8                 | 4.1E-02 | HIST1H1E            | 2.0    | 3.4E-03             | H1A-DRA   | 1.0    | 1.0E+00 | C1QB      | 6.4 | 1.4E-45 | DUSP2    | 1.5 | 9.3E-01 |
| 15   | RNF213              | 1.3    | 1.2E-01             | ZFP3612   | 1.1                 | 3.2E-05 | GZMB                | 1.8    | 1.3E-08             | IFI27     | 1.9                 | 5.2E-02 | SAT1                | 1.9    | 9.9E-03             | TXN       | 1.0    | 1.0E+00 | CTSL      | 6.3 | 8.3E-40 | TXNIP    | 1.5 | 1.0E+00 |
| 16   | JUND                | 1.3    | 1.3E-01             | CD6       | 1.1                 | 3.5E-05 | HMGB2               | 1.8    | 1.6E-08             | ETS1      | 1.8                 | 7.4E-02 | H1A-DRA             | 1.8    | 1.7E-02             | TNFSF10   | 0.9    | 1.0E+00 | C1QC      | 6.3 | 5.7E-43 | ZFP36    | 1.2 | 1.0E+00 |
| 17   | OGA                 | 1.3    | 1.3E-01             | GZMM      | 1.1                 | 3.8E-05 | FABP5               | 1.8    | 4.9E-08             | MT2A      | 1.8                 | 9.4E-02 | JUND                | 1.8    | 2.7E-02             | NEAT1     | 0.9    | 1.0E+00 | S100A9    | 6.1 | 4.8E-39 | BTGL     | 1.2 | 1.0E+00 |
| 18   | GNAS                | 1.3    | 1.3E-01             | CD69      | 1.1                 | 7.4E-05 | HMGN2               | 1.6    | 4.0E-07             | DUT       | 1.7                 | 9.9E-02 | PARP14              | 1.7    | 4.5E-02             | TYMP      | 0.9    | 1.0E+00 | TYROBP    | 5.9 | 4.2E-37 | MBP      | 1.1 | 1.0E+00 |
| 19   | MT-ND1              | 1.3    | 1.5E-01             | PDCD4     | 1.1                 | 1.7E-04 | H2AFZ               | 1.6    | 7.2E-07             | SET       | 1.7                 | 1.1E-01 | H1A-DPA1            | 1.7    | 4.7E-02             | MIF       | 0.8    | 1.0E+00 | LVZ       | 5.7 | 2.5E-32 | FGFBP2   | 1.1 | 1.0E+00 |
| 20   | STRK10              | 1.3    | 1.6E-01             | MALAT1    | 1.0                 | 2.1E-04 | IFI27               | 1.5    | 1.9E-06             | H1FX      | 1.7                 | 1.4E-01 | DUSP1               | 1.7    | 5.1E-02             | MT-ND6    | 0.8    | 1.0E+00 | RNASE1    | 5.6 | 5.8E-30 | PDCD4    | 1.1 | 1.0E+00 |
| 21   | MT-ND6              | 1.2    | 1.6E-01             | BTGL      | 1.0                 | 2.8E-04 | MT1E                | 1.5    | 2.0E-06             | H2AFV     | 1.7                 | 1.5E-01 | H1FX                | 1.6    | 7.5E-02             | LMNA      | 0.8    | 1.0E+00 | FCER1G    | 5.5 | 5.0E-29 | H1A-DPB1 | 1.1 | 1.0E+00 |
| 22   | MT-ND2              | 1.2    | 1.5E-01             | JUN       | 1.0                 | 6.0E-04 | DUT                 | 1.5    | 2.5E-06             | ITGB1     | 1.7                 | 1.5E-01 | CTSB                | 1.6    | 8.2E-02             | H1A-DRB1  | 0.8    | 1.0E+00 | CTSL      | 5.3 | 3.1E-25 | ZFP3612  | 1.0 | 1.0E+00 |
| 23   | KMT2A               | 1.2    | 1.6E-01             | KLF6      | 1.0                 | 7.0E-04 | PRF1                | 1.4    | 1.1E-05             | LYST      | 1.5                 | 2.1E-01 | H1A-DOB1            | 1.6    | 8.9E-02             | JUND      | 0.8    | 1.0E+00 | FCG2      | 5.1 | 4.1E-22 | H1A-DPA1 | 1.0 | 1.0E+00 |
| 24   | MT-ND4              | 1.2    | 1.6E-01             | FTH1      | 0.9                 | 2.9E-03 | PTMS                | 1.4    | 1.2E-05             | MT2B      | 1.5                 | 2.2E-01 | TNFSF10             | 1.5    | 9.1E-02             | TRBV28    | 0.8    | 1.0E+00 | IFI27     | 5.0 | 2.3E-21 | DDIT4    | 1.0 | 1.0E+00 |
| 25   | SRRM2               | 1.2    | 1.7E-01             | LINC02446 | 0.8                 | 4.8E-03 | LAG3                | 1.4    | 2.3E-05             | IFI16     | 1.5                 | 2.6E-01 | FTL                 | 1.5    | 9.3E-02             | MT-ND4    | 0.8    | 1.0E+00 | AIFI      | 4.7 | 2.3E-17 | JUNB     | 1.0 | 1.0E+00 |

Shared or indicative of clusters 1-2

Shared or indicative of clusters 3-4

Shared or indicative of clusters 5-8
