# Supplementary material for: Multiomic single-cell sequencing defines tissue-specific responses in Stevens-Johnson Syndrome and Toxic epidermal necrolysis
Source: PubMed Central journal article supplement — bioRxiv. 2024 Feb 18:2023.11.26.568771. Preprint. [Version 2] doi: 10.1101/2023.11.26.568771 (PMC10888802; doi:10.1101/2023.11.26.568771), 2024-02-18
Supplement: media-8.pdf [file media-8.pdf]

**Extended Data Table 2. Differential gene signatures of keratinocytes and CD8 Tconv in affected compared to unaffected skin.** The genes that show significant (Wilcoxon rank sum test, Benjamini Hochberg adjusted  $p < 0.05$ ) increased expression are shown in order of fold change. Red font indicates genes significantly differentially expressed but below the threshold for fold change (0.6 log<sub>2</sub>FC, 1.5 actual fold change). *FDR adj p*, False discovery rate adjusted *p*-value; *FC*, fold change; *Tconv*, T conventional cell.

| Rank | Keratinocyte signature |           |                     | CD8 Tconv signature |           |                     |
|------|------------------------|-----------|---------------------|---------------------|-----------|---------------------|
|      | Gene                   | FDR adj p | log <sub>2</sub> FC | Gene                | FDR adj p | log <sub>2</sub> FC |
| 1    | CD74                   | 1.2E-34   | 2.0                 | GNLY                | 2.2E-02   | 1.3                 |
| 2    | IFITM3                 | 1.2E-22   | 1.8                 | CD27                | 1.7E-05   | 0.7                 |
| 3    | IFI6                   | 6.3E-34   | 1.7                 | LY6E                | 2.4E-03   | 0.7                 |
| 4    | IFITM1                 | 2.8E-33   | 1.6                 | PSMB9               | 3.6E-04   | 0.6                 |
| 5    | HLA-C                  | 8.6E-12   | 1.3                 | RNF213              | 1.4E-03   | 0.6                 |
| 6    | HLA-B                  | 5.2E-05   | 1.1                 | LAG3                | 1.5E-03   | 0.6                 |
| 7    | B2M                    | 1.4E-14   | 1.1                 | LIMD2               | 9.1E-03   | 0.6                 |
| 8    | KRT6B                  | 4.0E-04   | 1.1                 | TIGIT               | 1.1E-02   | 0.5                 |
| 9    | LY6E                   | 1.3E-04   | 0.9                 | GALNT2              | 4.7E-03   | 0.5                 |
| 10   | PSME2                  | 1.0E-07   | 0.8                 | IFI6                | 1.1E-02   | 0.5                 |
| 11   | TMSB10                 | 1.3E-04   | 0.8                 | LYST                | 1.5E-02   | 0.5                 |
| 12   | CST3                   | 1.3E-04   | 0.8                 | XAF1                | 7.2E-04   | 0.4                 |
| 13   | DCD                    | 1.5E-04   | 0.8                 | GBP2                | 1.4E-02   | 0.4                 |
| 14   | STAT1                  | 4.2E-12   | 0.8                 | DCD                 | 4.8E-02   | 0.4                 |
| 15   | VIM                    | 2.1E-04   | 0.7                 | ACP5                | 1.1E-02   | 0.4                 |
| 16   | GSTP1                  | 3.8E-03   | 0.7                 |                     |           |                     |
| 17   | IFI27                  | 1.3E-09   | 0.7                 |                     |           |                     |
| 18   | CCL4                   | 8.7E-11   | 0.7                 |                     |           |                     |
| 19   | PSME1                  | 1.2E-02   | 0.7                 |                     |           |                     |
| 20   | PSMB9                  | 2.5E-11   | 0.6                 |                     |           |                     |
| 21   | GAPDH                  | 8.7E-08   | 0.6                 |                     |           |                     |
