# Supplementary material for: Multiomic single-cell sequencing defines tissue-specific responses in Stevens-Johnson Syndrome and Toxic epidermal necrolysis
Source: PubMed Central journal article supplement — bioRxiv. 2024 Feb 18:2023.11.26.568771. Preprint. [Version 2] doi: 10.1101/2023.11.26.568771 (PMC10888802; doi:10.1101/2023.11.26.568771), 2024-02-18
Supplement: media-9.pdf [file media-9.pdf]

**Extended Data Table 3. Differential gene signatures of CD8 Tconv expressing dominantly expanded TCR compared to other TCR in affected skin or blister fluid.** The genes that show significant (Wilcoxon rank sum test, Benjamini Hochberg adjusted  $p < 0.05$ ) increased expression above the threshold for fold-change ( $0.6 \log_2 FC$ ) are shown. Genes shared in the signature of dominantly-expanded TCR+ Tconv between affected skin and blister fluid highlighted blue. *TCR*, T-cell receptor; *FDR adj p*, False discovery rate adjusted  $p$ -value; *FC*, fold change; *Tconv*, T conventional cell.

| Rank | Dominant TCR in affected skin |           |        | Dominant TCR in Blister fluid |           |        |
|------|-------------------------------|-----------|--------|-------------------------------|-----------|--------|
|      | Gene                          | FDR adj p | log2FC | Gene                          | FDR adj p | log2FC |
| 1    | GNLY                          | 1.0E-06   | 2.7    | GNLY                          | 1.5E-118  | 1.9    |
| 2    | GZMB                          | 6.1E-04   | 1.6    | LAG3                          | 6.5E-175  | 1.5    |
| 3    | KLRC1                         | 3.6E-16   | 1.4    | TIGIT                         | 6.0E-142  | 1.3    |
| 4    | GALNT2                        | 3.3E-07   | 1.4    | KLRC1                         | 1.6E-158  | 1.3    |
| 5    | LAG3                          | 2.6E-07   | 1.3    | GZMB                          | 7.7E-65   | 1.1    |
| 6    | BATF                          | 5.8E-08   | 1.3    | PRF1                          | 1.9E-119  | 1.1    |
| 7    | PRF1                          | 2.5E-03   | 1.2    | PHLDA1                        | 3.3E-150  | 1.0    |
| 8    | DUSP4                         | 5.2E-06   | 1.2    | GALNT2                        | 6.3E-123  | 1.0    |
| 9    | PTMS                          | 2.6E-06   | 1.1    | FCGR3A                        | 8.0E-90   | 1.0    |
| 10   | FCGR3A                        | 1.2E-03   | 1.0    | ACP5                          | 8.9E-100  | 1.0    |
| 11   | TIGIT                         | 2.3E-03   | 1.0    | NGK7                          | 9.1E-102  | 1.0    |
| 12   | ACP5                          | 2.8E-06   | 1.0    | HAVCR2                        | 1.3E-95   | 0.9    |
| 13   | LYST                          | 2.1E-05   | 1.0    | IGFLR1                        | 4.4E-120  | 0.9    |
| 14   | HAVCR2                        | 3.2E-05   | 0.9    | GAPDH                         | 3.8E-108  | 0.8    |
| 15   | CD27                          | 2.1E-02   | 0.9    | ENTPD1                        | 2.3E-115  | 0.8    |
| 16   | MT1E                          | 2.9E-03   | 0.9    | KLRD1                         | 1.0E-61   | 0.8    |
| 17   | LAYN                          | 2.0E-09   | 0.9    | LYST                          | 3.7E-87   | 0.8    |
| 18   | RAB27A                        | 2.5E-05   | 0.9    | PTMS                          | 1.5E-79   | 0.8    |
| 19   | SNX9                          | 4.0E-04   | 0.9    | TNFRSF1B                      | 2.0E-74   | 0.8    |
| 20   | GAPDH                         | 1.5E-06   | 0.9    | HMOX1                         | 2.6E-145  | 0.8    |
| 21   | TNFRSF9                       | 9.4E-10   | 0.9    | PKM                           | 4.7E-63   | 0.8    |
| 22   | CD59                          | 8.6E-06   | 0.9    | LAYN                          | 3.7E-138  | 0.8    |
| 23   | AHI1                          | 1.1E-05   | 0.9    | SIRPG                         | 1.1E-73   | 0.7    |
| 24   | PKM                           | 1.5E-02   | 0.8    | CCL4                          | 5.0E-23   | 0.7    |
| 25   | PHLDA1                        | 2.6E-02   | 0.8    | CD27                          | 1.4E-66   | 0.7    |
| 26   | CBLB                          | 1.4E-02   | 0.8    | TNFRSF9                       | 8.5E-134  | 0.7    |
| 27   | MTSS1                         | 1.2E-08   | 0.8    | CBLB                          | 7.3E-67   | 0.7    |
| 28   | HMOX1                         | 1.2E-09   | 0.8    | CCL3                          | 5.7E-68   | 0.7    |
| 29   | ENTPD1                        | 2.6E-07   | 0.8    | AD000671.2                    | 4.7E-93   | 0.7    |
| 30   | AD000671.2                    | 1.2E-03   | 0.8    | ADGRG1                        | 1.1E-128  | 0.7    |
| 31   | CTLA4                         | 1.8E-05   | 0.8    | CD63                          | 3.3E-59   | 0.7    |
| 32   | CD70                          | 2.2E-10   | 0.7    | LSP1                          | 3.1E-86   | 0.7    |
| 33   | LSP1                          | 1.6E-03   | 0.7    | CD8A                          | 1.5E-42   | 0.7    |
| 34   | PPM1G                         | 2.0E-02   | 0.7    | S100A4                        | 1.3E-50   | 0.7    |
| 35   | APOBEC3C                      | 4.4E-02   | 0.6    | LINC01943                     | 1.6E-82   | 0.7    |
| 36   | CD38                          | 2.5E-03   | 0.6    | SERPINB1                      | 2.8E-53   | 0.6    |
| 37   |                               |           |        | LINC01871                     | 2.9E-42   | 0.6    |
| 38   |                               |           |        | RHOB                          | 5.2E-129  | 0.6    |
| 39   |                               |           |        | RAB27A                        | 3.9E-61   | 0.6    |
| 40   |                               |           |        | DUSP4                         | 7.4E-83   | 0.6    |
| 41   |                               |           |        | AC017002.3                    | 5.0E-92   | 0.6    |
| 42   |                               |           |        | NEAT1                         | 5.9E-31   | 0.6    |
| 43   |                               |           |        | IFNG                          | 4.1E-60   | 0.6    |
| 44   |                               |           |        | SNX9                          | 4.3E-92   | 0.6    |
| 45   |                               |           |        | ITGA4                         | 1.8E-48   | 0.6    |
| 46   |                               |           |        | PGAM1                         | 4.0E-48   | 0.6    |
| 47   |                               |           |        | CTLA4                         | 1.9E-65   | 0.6    |
