# Supplementary material for: Multiomic single-cell sequencing defines tissue-specific responses in Stevens-Johnson Syndrome and Toxic epidermal necrolysis
Source: PubMed Central journal article supplement — bioRxiv. 2024 Feb 18:2023.11.26.568771. Preprint. [Version 2] doi: 10.1101/2023.11.26.568771 (PMC10888802; doi:10.1101/2023.11.26.568771), 2024-02-18
Supplement: media-10.pdf [file media-10.pdf]

**Extended Data Table 4. Unexpanded clonotypes of CD8+ Tconv cluster 3 with a shared CDR $\beta$  sequence with the dominantly-expanded clonotypes.** Unexpanded clonotypes from CD8 Tconv cluster 3 of blister fluids 1-3 are shown that have the exact same CDR3 $\beta$  CASSPDRGGYEQYF sequence as the dominantly-expanded TCR+ population or a single mismatch (underlined). The 'Dual TCR' column indicates if this n=1 count TCR is expressed on a dual TCR+ cell (yes or no). TCRs expressed on the same dual TCR+ cell are indicated by the same symbol (o, ●, ◊, ‡). *Tconv*, *T conventional cell*; *TCR*, *T-cell receptor*; *TRAV*, *TCR alpha variable*; *TRBV*, *TCR beta variable*; *TRAJ*, *TCR alpha joining*; *TRBJ*, *TCR beta joining*; *CDR3*, *complementary-determining region*; *Ct.*, *count*.

**Blister fluid 1 (ARM, 338 unexpanded cells from CD8 Tconv cluster 3)**

| TCR | CDR3 $\alpha$      | CDR3 $\beta$            | TRAV       | TRAJ   | TRBV     | TRBJ    | Dual |       |
|-----|--------------------|-------------------------|------------|--------|----------|---------|------|-------|
|     |                    |                         |            |        |          |         | Ct.  | TCR+  |
| 1   | CAVQAFRQTGANNLFF   | CASSH <u>DR</u> GGYEQYF | TRAV20     | TRAJ36 | TRBV27   | TRBJ2-7 | 1    | yes o |
| 2   | CALSEVTTSGTYKYIF   | CASSH <u>DR</u> GGYEQYF | TRAV19     | TRAJ40 | TRBV27   | TRBJ2-7 | 1    | yes o |
| 3   | CVVATNAGGTSYGKLTFF | CASSPDRGGYEQYF          | TRAV10     | TRAJ52 | TRBV27   | TRBJ2-7 | 1    | yes   |
| 4   | CALSEVTTSGTYKYIF   | CASSR <u>DR</u> GGYEQYF | TRAV19     | TRAJ40 | TRBV27   | TRBJ2-7 | 1    | no    |
| 5   | CAAIDSWGKLOF       | CASSL <u>DR</u> GGYEQYF | TRAV23/DV6 | TRAJ24 | TRBV11-2 | TRBJ2-7 | 1    | yes ‡ |
| 6   | CALSEVRTSGTYKYIF   | CASSL <u>DR</u> GGYEQYF | TRAV19     | TRAJ40 | TRBV11-2 | TRBJ2-7 | 1    | yes ‡ |

**Blister fluid 2 (FACE, 181 unexpanded cells from CD8 Tconv cluster 3)**

| TCR | CDR3 $\alpha$    | CDR3 $\beta$            | TRAV     | TRAJ   | TRBV   | TRBJ    | Dual |       |
|-----|------------------|-------------------------|----------|--------|--------|---------|------|-------|
|     |                  |                         |          |        |        |         | Ct.  | TCR+  |
| 1   | CALSEVTTSGTYKYIF | CASSH <u>DR</u> GGYEQYF | TRAV19   | TRAJ40 | TRBV27 | TRBJ2-7 | 1    | yes o |
| 2   | CAVQAFRQTGANNLFF | CASSH <u>DR</u> GGYEQYF | TRAV20   | TRAJ36 | TRBV27 | TRBJ2-7 | 1    | yes o |
| 3   | CAADTGGFKTIF     | CASSPDRGGYEQYF          | TRAV13-1 | TRAJ9  | TRBV27 | TRBJ2-7 | 1    | yes ● |
| 4   | CIVRVHSGGGADGLTF | CASSPDRGGYEQYF          | TRAV26-1 | TRAJ45 | TRBV27 | TRBJ2-7 | 1    | yes ● |
| 5   | CAVTDNYGQNFVF    | CASSPDRGGYEQYF          | TRAV25   | TRAJ26 | TRBV27 | TRBJ2-7 | 1    | yes ◊ |
| 6   | CALSANSNGNTPLVF  | CASSPDRGGYEQYF          | TRAV16   | TRAJ29 | TRBV27 | TRBJ2-7 | 1    | yes ◊ |
| 7   | CAVQTNAGNNRKLIF  | CASSPDRGGYEQYF          | TRAV20   | TRAJ38 | TRBV27 | TRBJ2-7 | 1    | yes   |
| 8   | CAVKYTGANSKLTFF  | CASSPDRGGYEQYF          | TRAV12-2 | TRAJ56 | TRBV27 | TRBJ2-7 | 1    | yes   |
| 9   | CAAGSSSGTYKYIF   | CASSPDRGGYEQYF          | TRAV13-1 | TRAJ40 | TRBV27 | TRBJ2-7 | 1    | yes   |

**Blister fluid 3 (FOOT, 137 unexpanded cells from CD8 Tconv cluster 3)**

| TCR | CDR3 $\alpha$    | CDR3 $\beta$            | TRAV       | TRAJ   | TRBV   | TRBJ    | Dual |       |
|-----|------------------|-------------------------|------------|--------|--------|---------|------|-------|
|     |                  |                         |            |        |        |         | Ct.  | TCR+  |
| 1   | CALSEVTTSGTYKYIF | CASSH <u>DR</u> GGYEQYF | TRAV19     | TRAJ40 | TRBV27 | TRBJ2-7 | 1    | yes o |
| 2   | CAVQAFRQTGANNLFF | CASSH <u>DR</u> GGYEQYF | TRAV20     | TRAJ36 | TRBV27 | TRBJ2-7 | 1    | yes o |
| 3   | CAASMTSAGNMLTF   | CASSV <u>DR</u> GGYEQYF | TRAV23/DV6 | TRAJ39 | TRBV27 | TRBJ2-7 | 1    | yes □ |
| 4   | CALSEVTTSGTYKYIF | CASSV <u>DR</u> GGYEQYF | TRAV19     | TRAJ40 | TRBV27 | TRBJ2-7 | 1    | yes □ |
| 5   | CALSEVTTSGTYKYIF | CASSY <u>DR</u> GGYEQYF | TRAV19     | TRAJ40 | TRBV27 | TRBJ2-7 | 1    | yes   |
| 6   | CALSEVTTSGTYKYIF | CASSF <u>DR</u> GGYEQYF | TRAV19     | TRAJ40 | TRBV27 | TRBJ2-7 | 1    | no    |
